# Supplementary material for: Exosomes Derived from Adipose Mesenchymal Stem Cells Promote Diabetic Chronic Wound Healing through SIRT3/SOD2
Source: MDPI journal article supplement (doi:10.3390/cells11162568), 2022-08-18

Table S1 Specify acronyms in figures.

|           |                                                |
|-----------|------------------------------------------------|
| ADSC-exos | Adipose mesenchymal stem cell-derived exosomes |
| HUVECs    | Human Umbilical Vein Endothelial Cells         |
| ROS       | Reactive Oxygen Species                        |
| SIRT3     | Sirtuin 3                                      |
| SOD2      | Superoxide Dismutase 2                         |
| EPC       | Endothelial Progenitor Cell                    |
| MMP       | Mitochondrial Membrane Potential               |
| FBG       | Fasting Blood Glucose                          |
| MDA       | Malondialdehyde                                |
| T-AOC     | Total Antioxidant Capacity                     |
| SOD       | Superoxide Dismutase                           |
| CCK-8     | cell counting kit-8                            |
| AC-SOD2   | Acetylated Superoxide Dismutase 2              |
| ANG1      | Angiopoietin-1                                 |
| FLK1      | fetal liver kinase-1                           |
| VASH1     | Vasohibin 1                                    |
| TSP1      | thrombospondin-1                               |

Figure S1 blood vessel density in db/db mice wound.

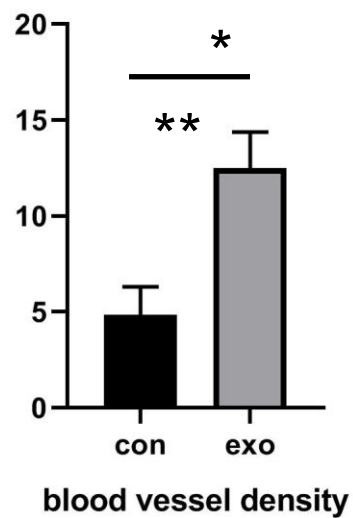

Supplement: s1 [file s1]
